# Supplementary material
Source: PubMed Central journal article supplement (PMC3778863)
Supplement: 112.042523_ajcn042523SupplementaryData1.pdf [file 112.042523_ajcn042523SupplementaryData1.pdf]

## Supplemental Figure S1

### Flow Diagram

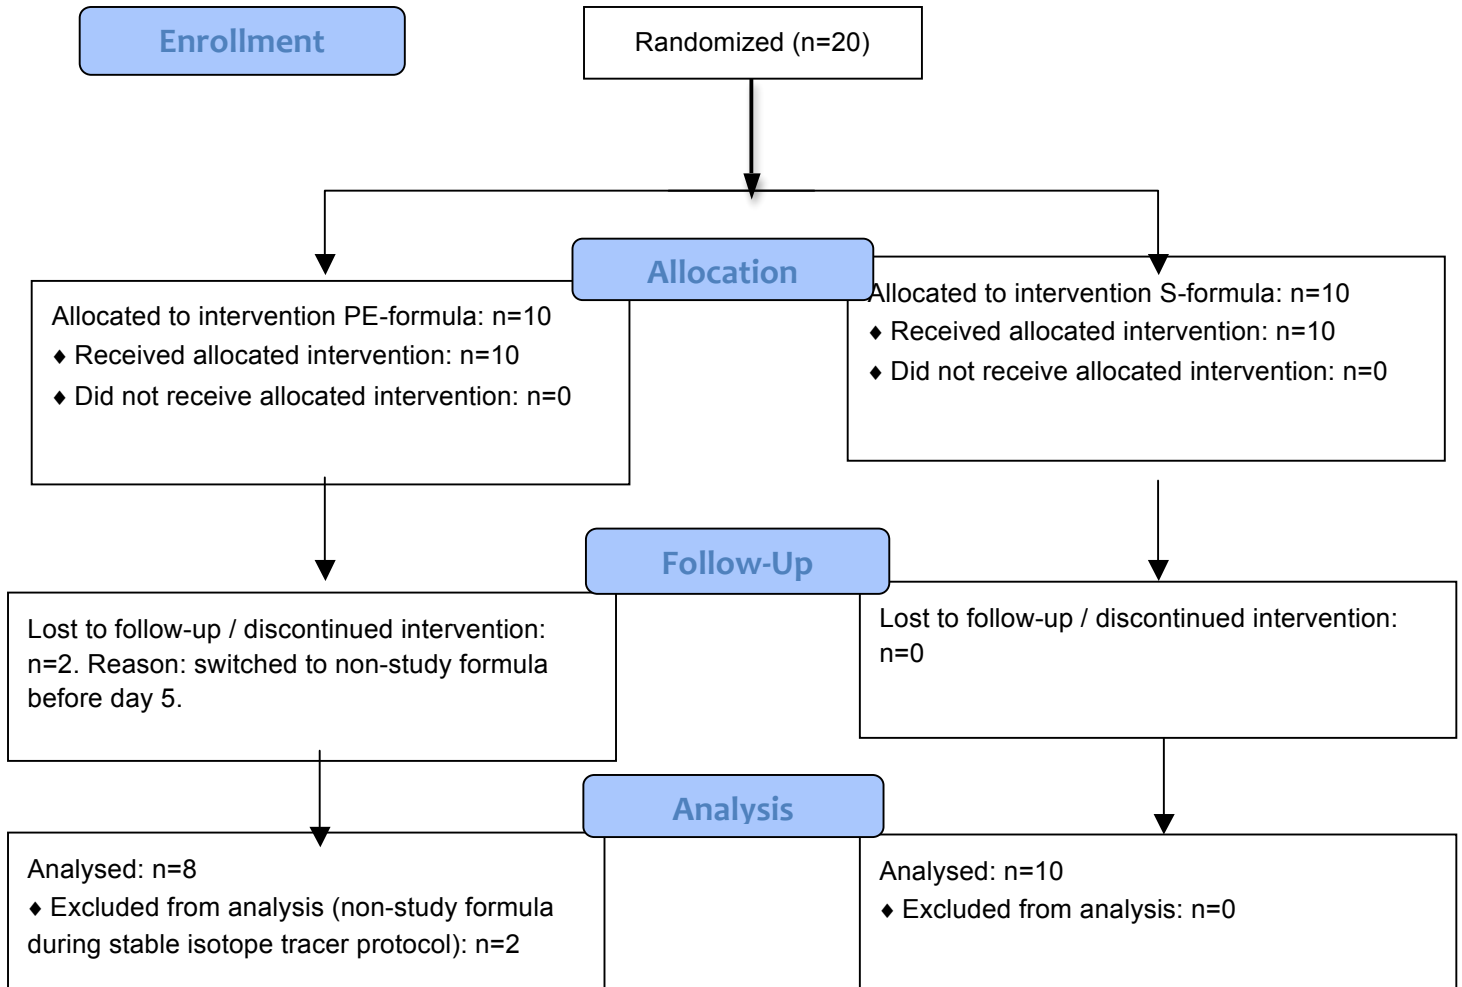

PE-formula, protein-energy enriched formula; S-formula, standard infant formula
